# Supplementary material
Source: PubMed Central journal article supplement (PMC5539966)

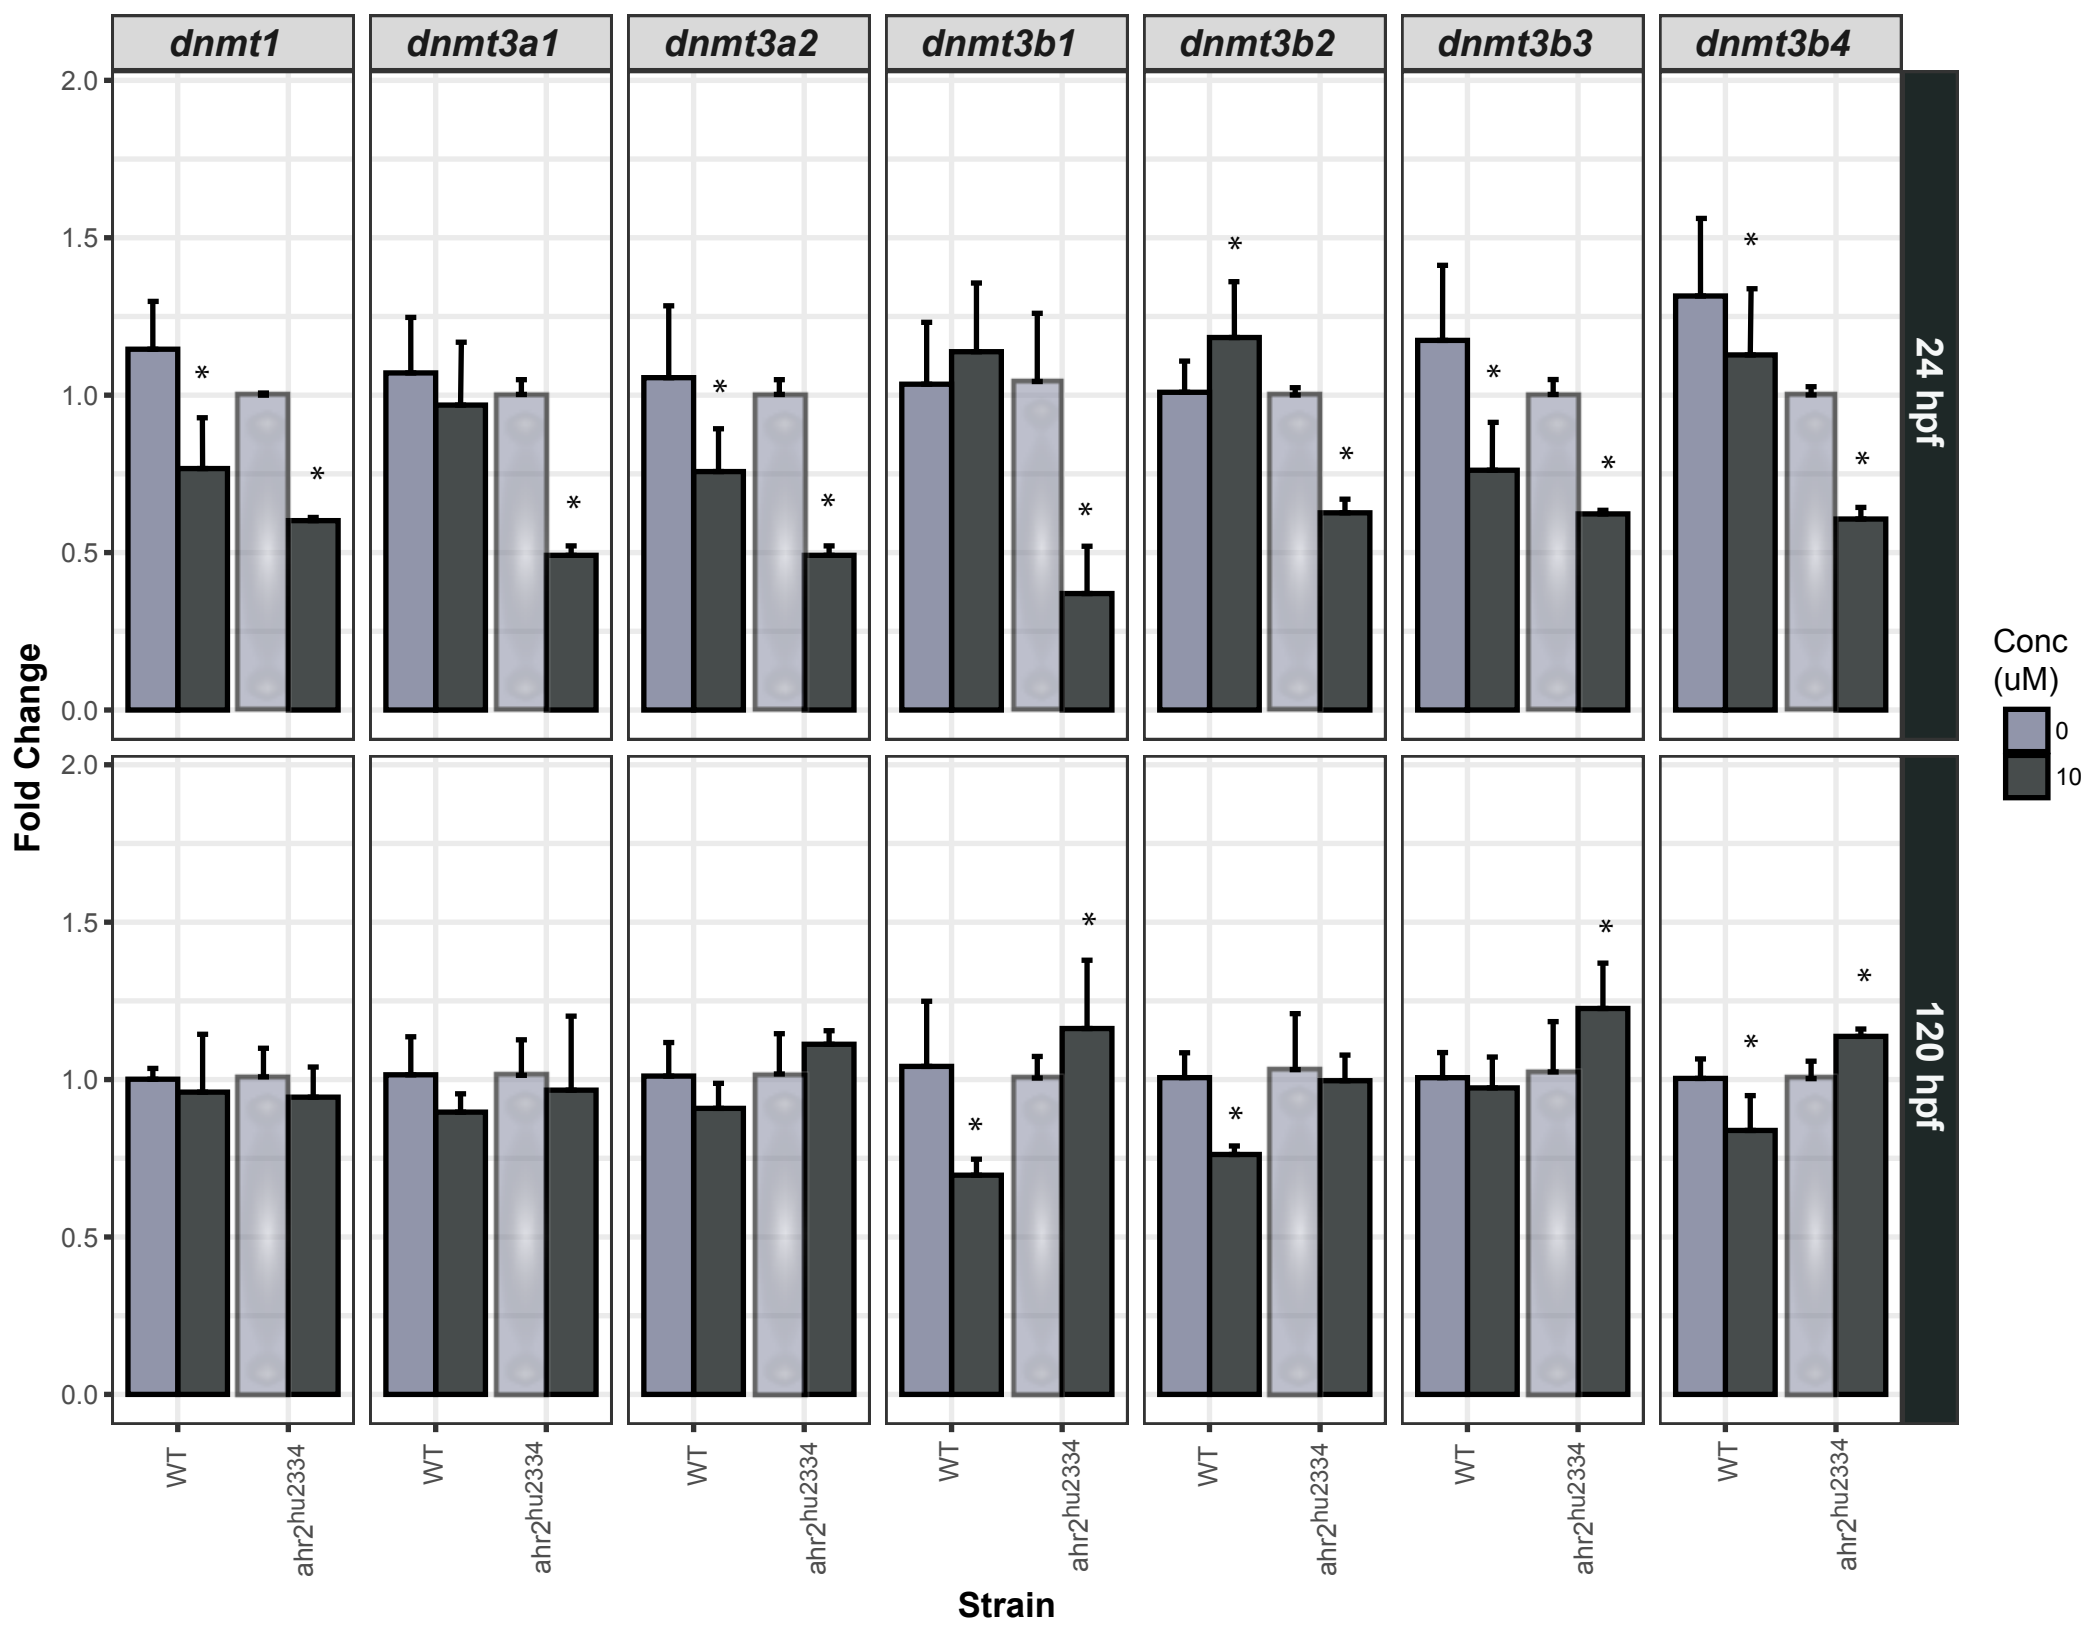

Supplement: NIHMS883927-supplement-1.pdf [file NIHMS883927-supplement-1.pdf]
